# Supplementary material
Source: PubMed Central journal article supplement (PMC7534619)

# Source data Figure EV5A

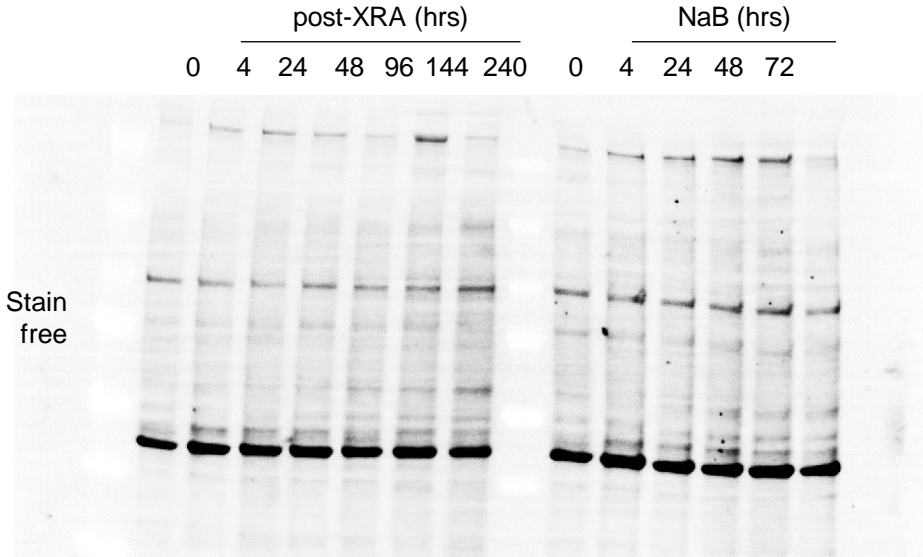

Nuclear soluble

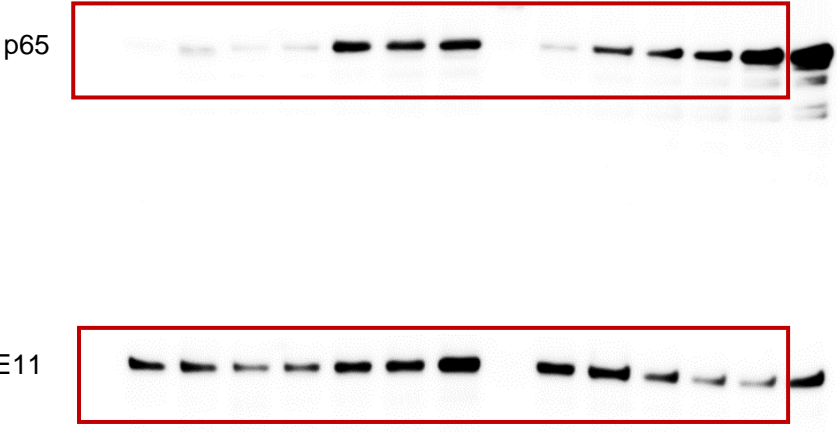

Nuclear soluble

# Source data Figure EV5B

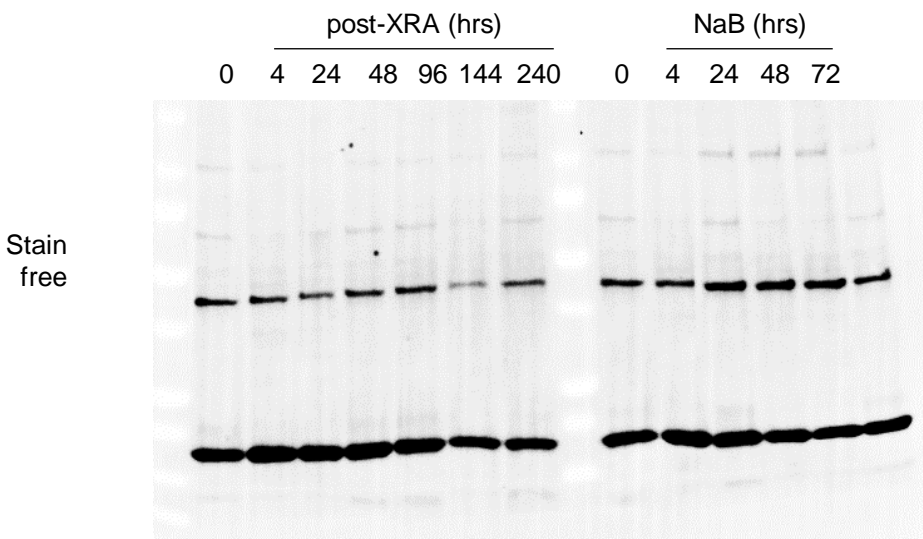

Chromatin

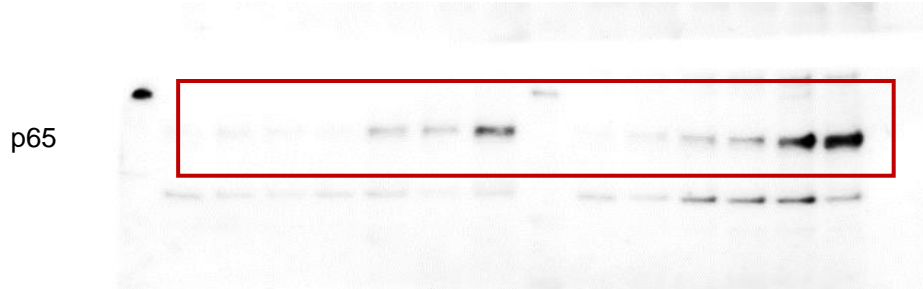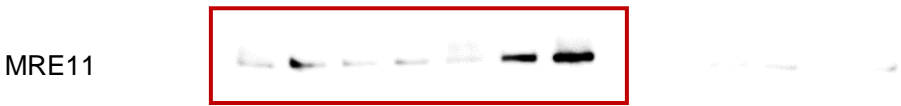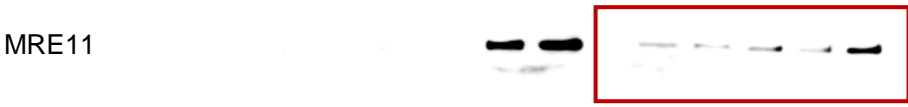

Source data Figure EV5C

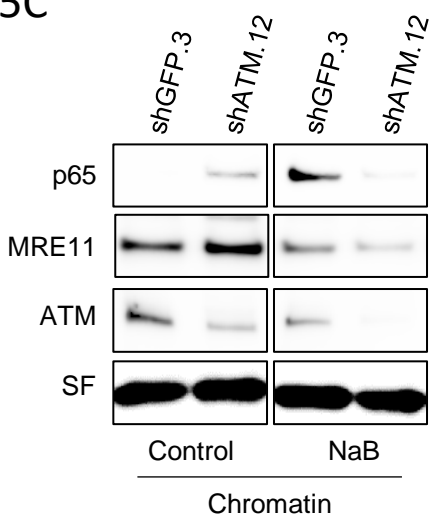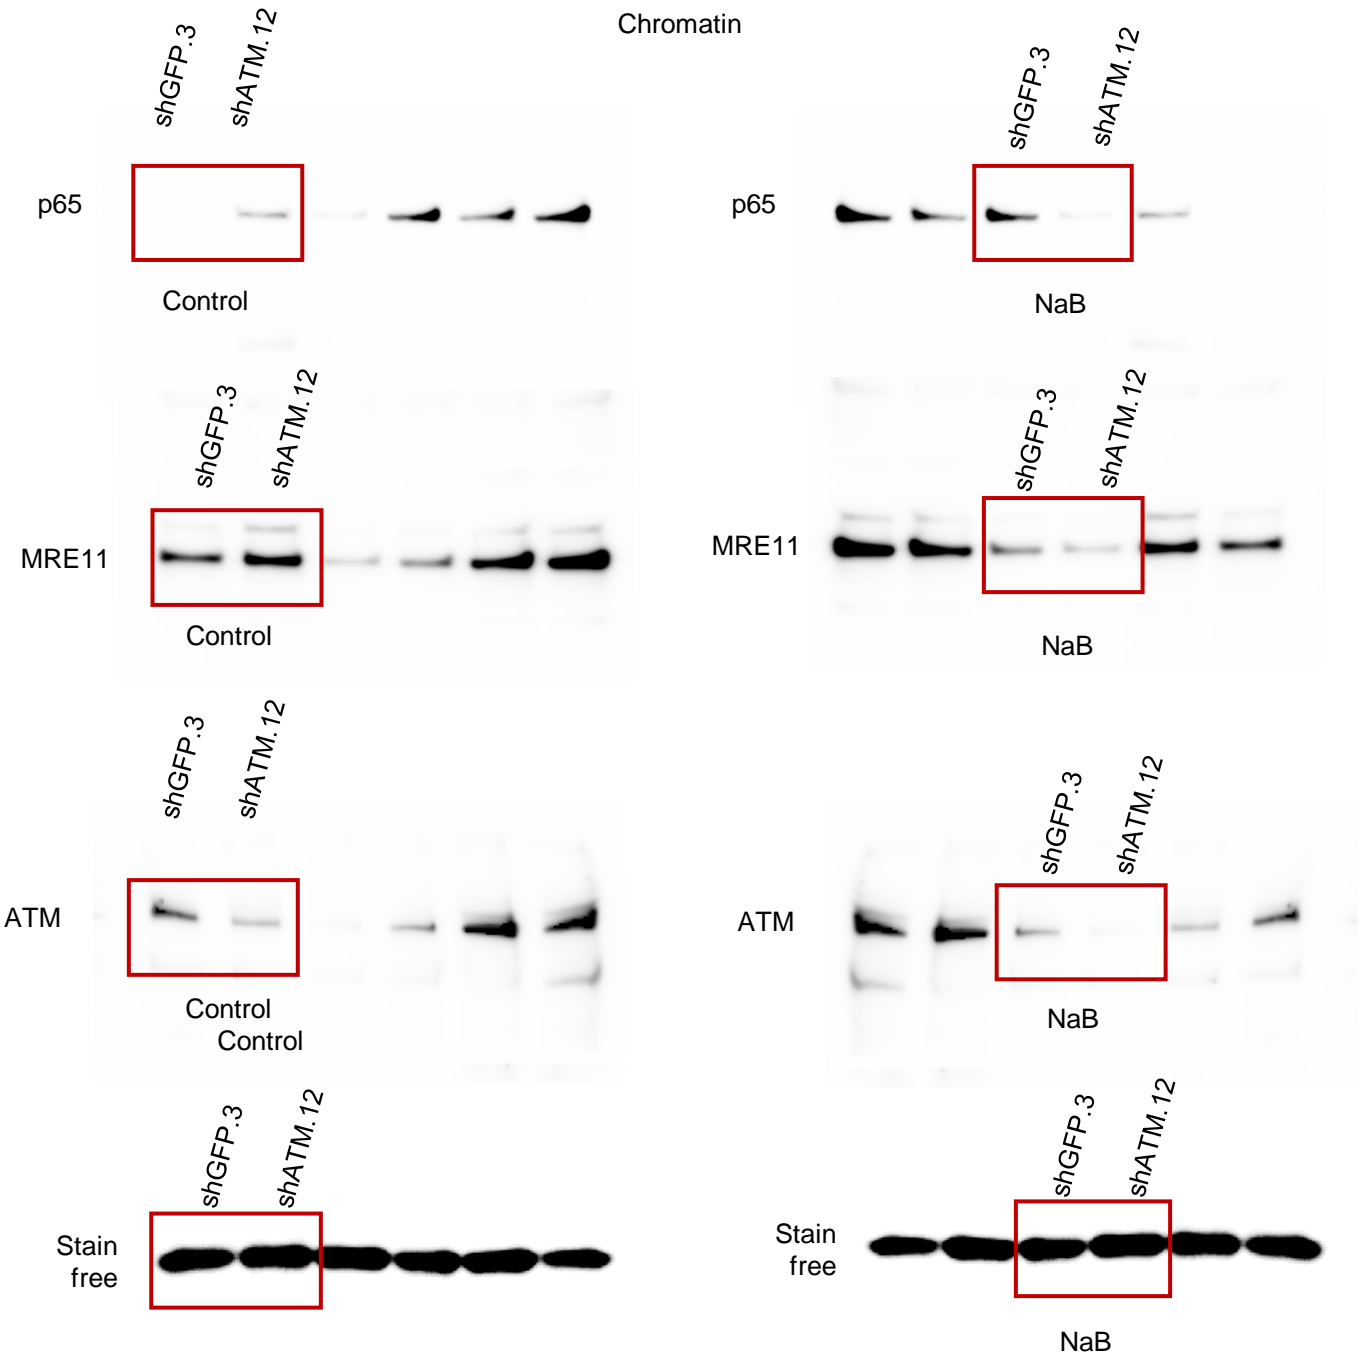

# Source data Figure EV5D

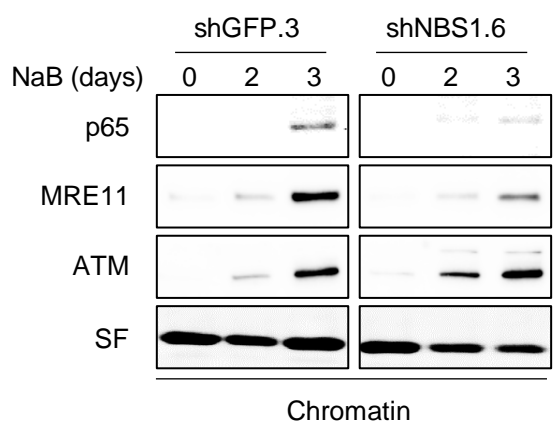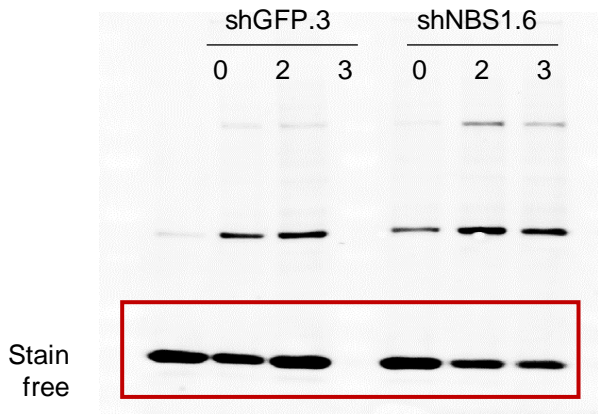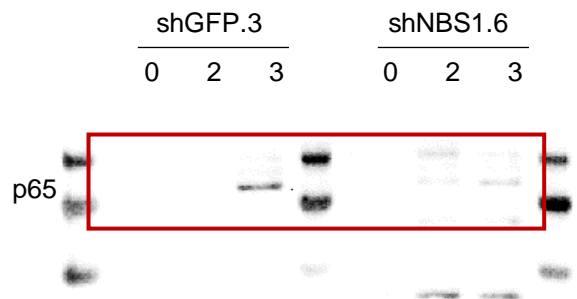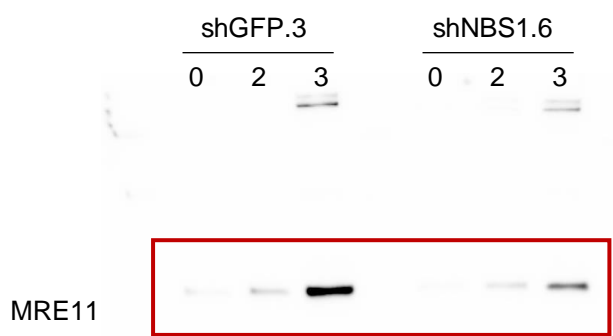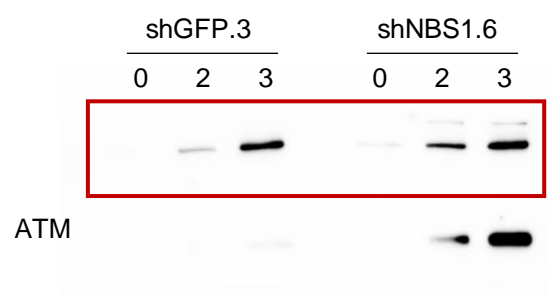

Supplement: EMBR-21-e50718-s004.pdf [file EMBR-21-e50718-s004.pdf]
