# Supplementary material
Source: PubMed Central journal article supplement (PMC7534619)

# Source data Figure 6A

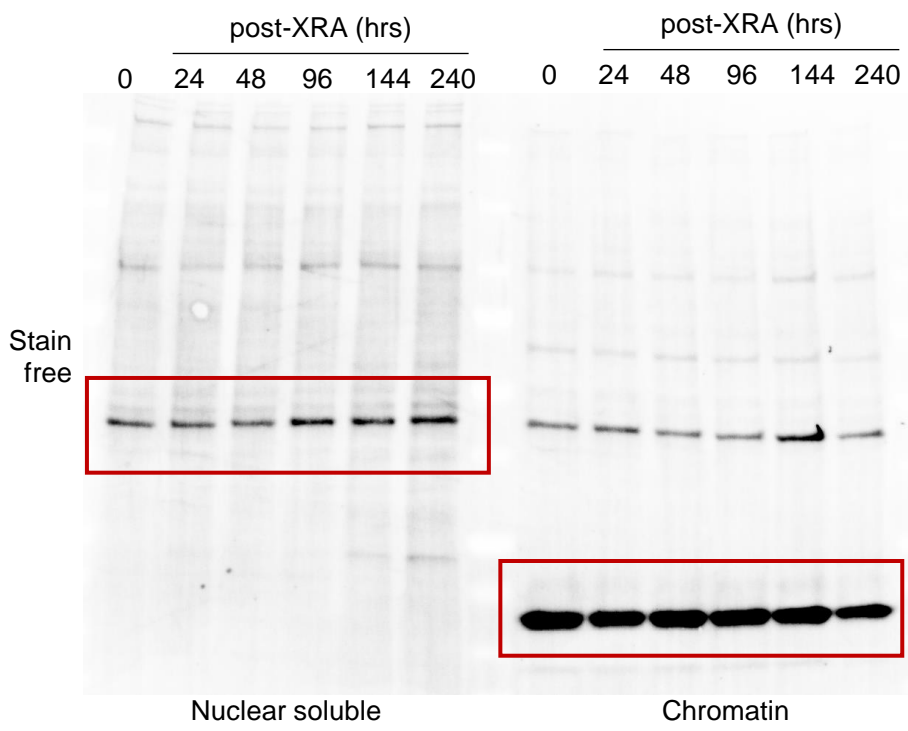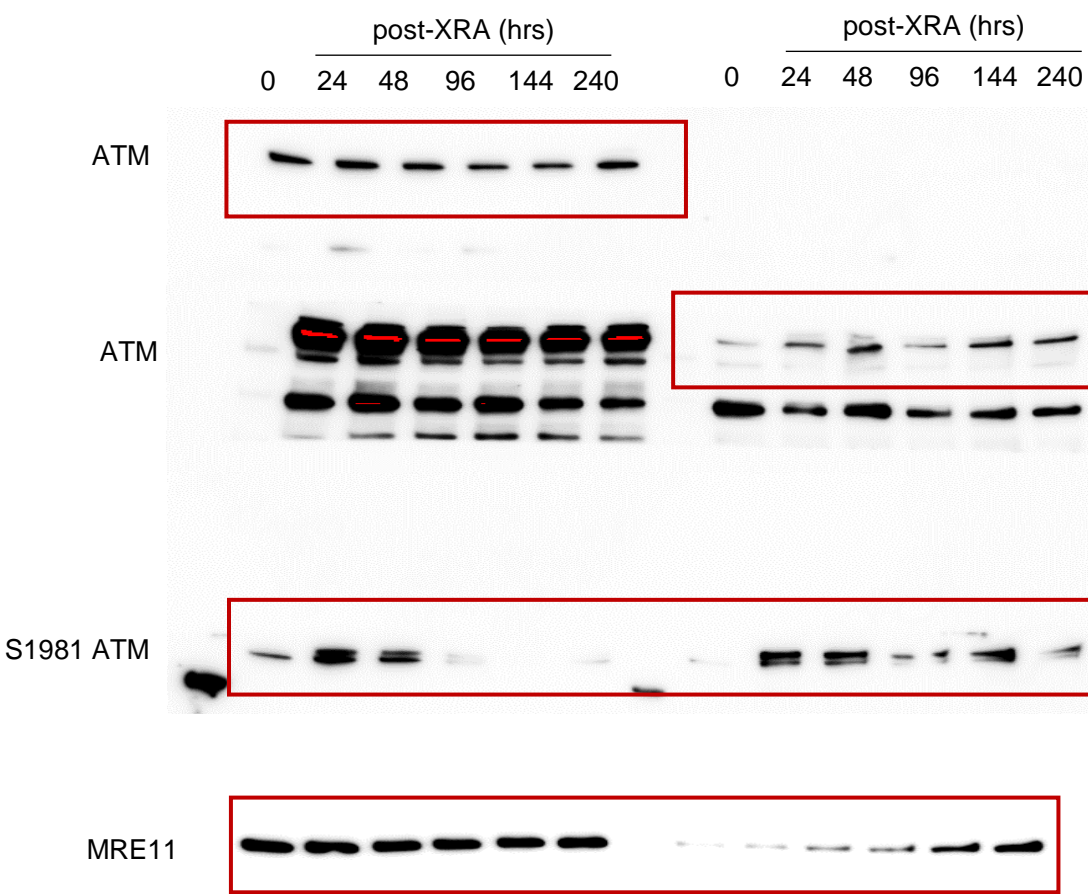

Source data Figure 6C

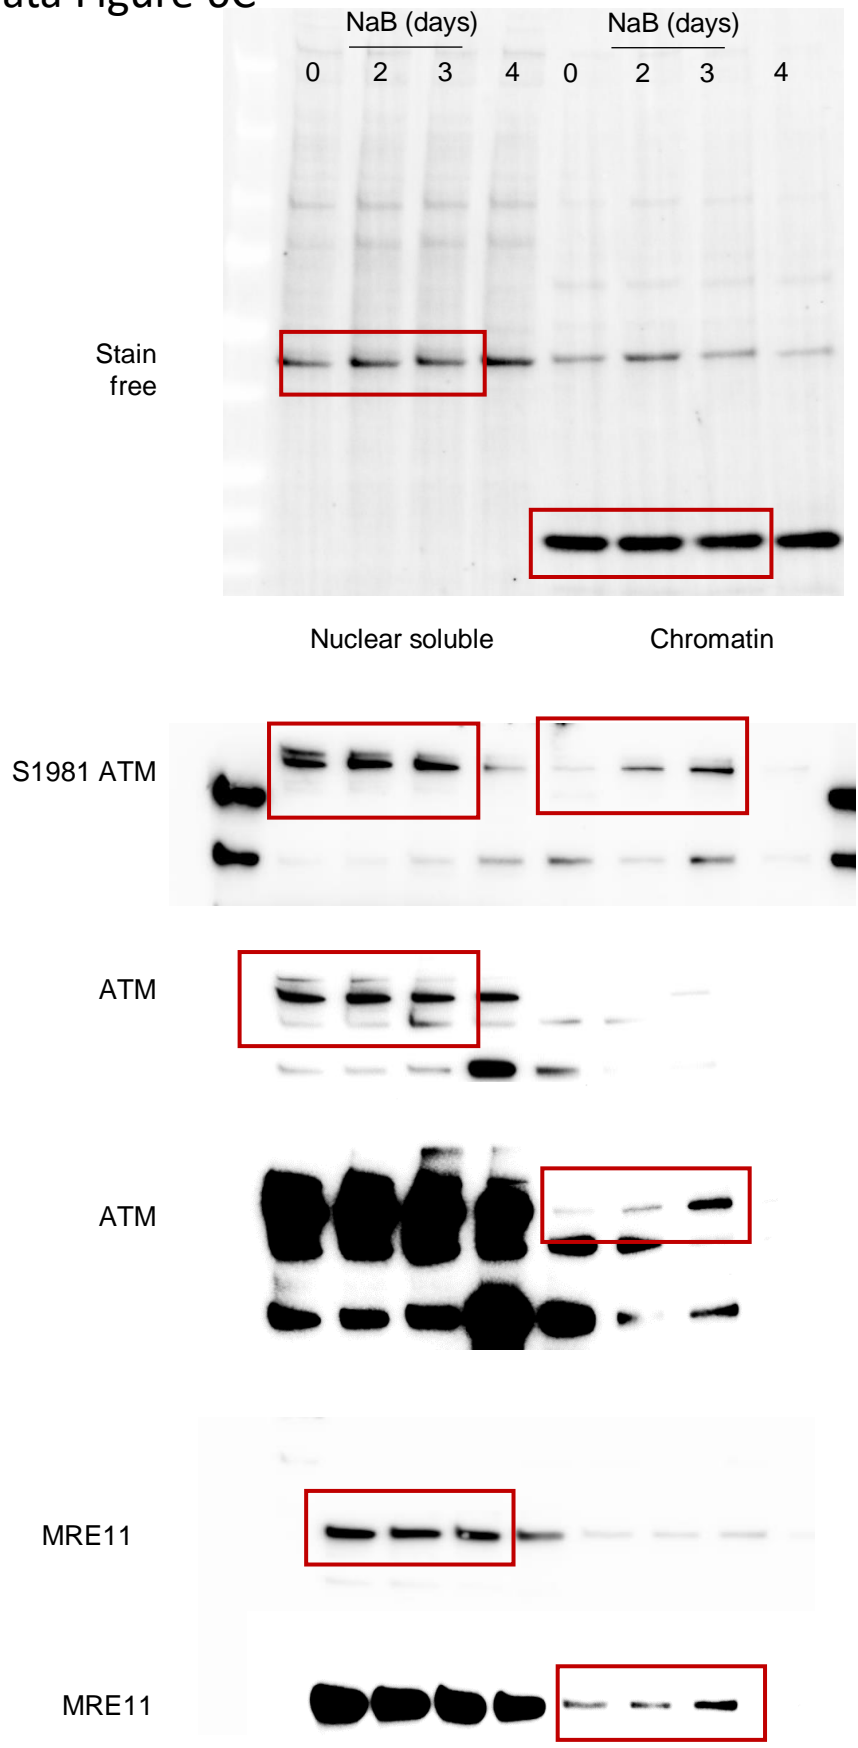

# Source data Figure 6E

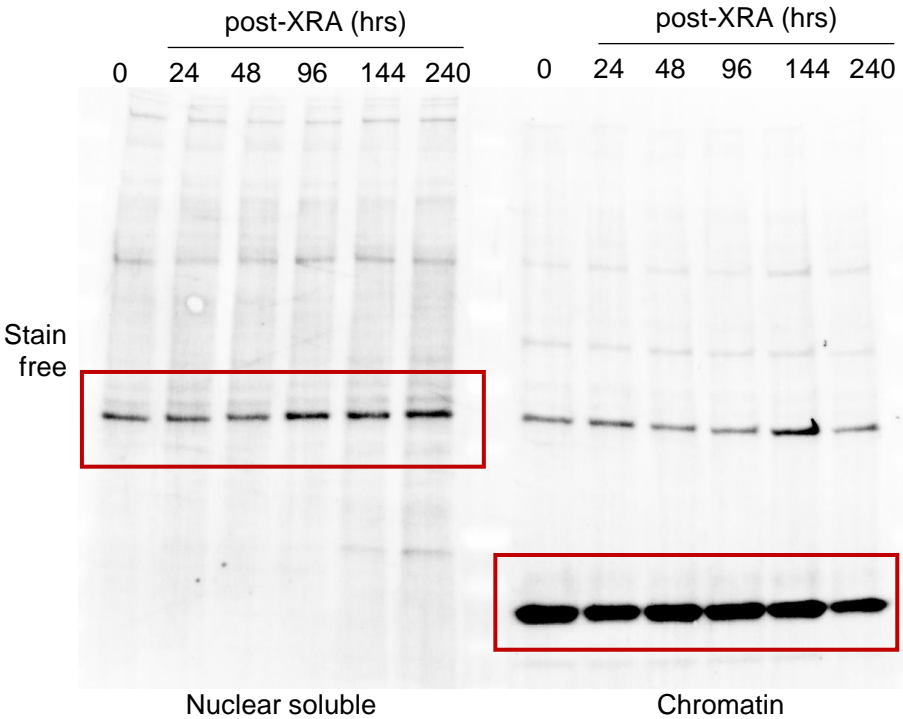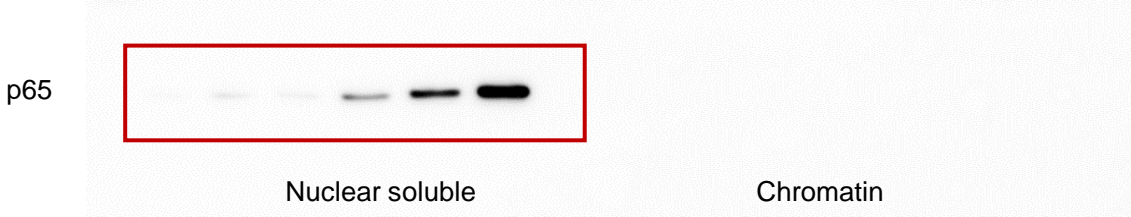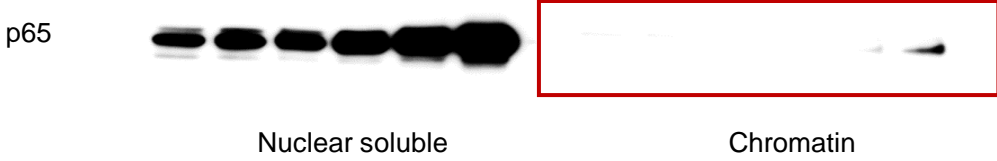

Source data Figure 6G

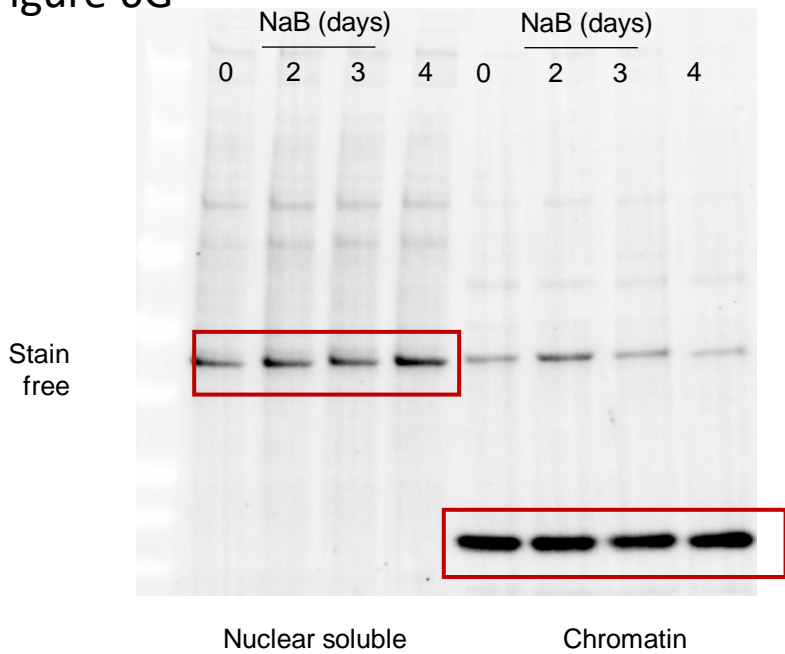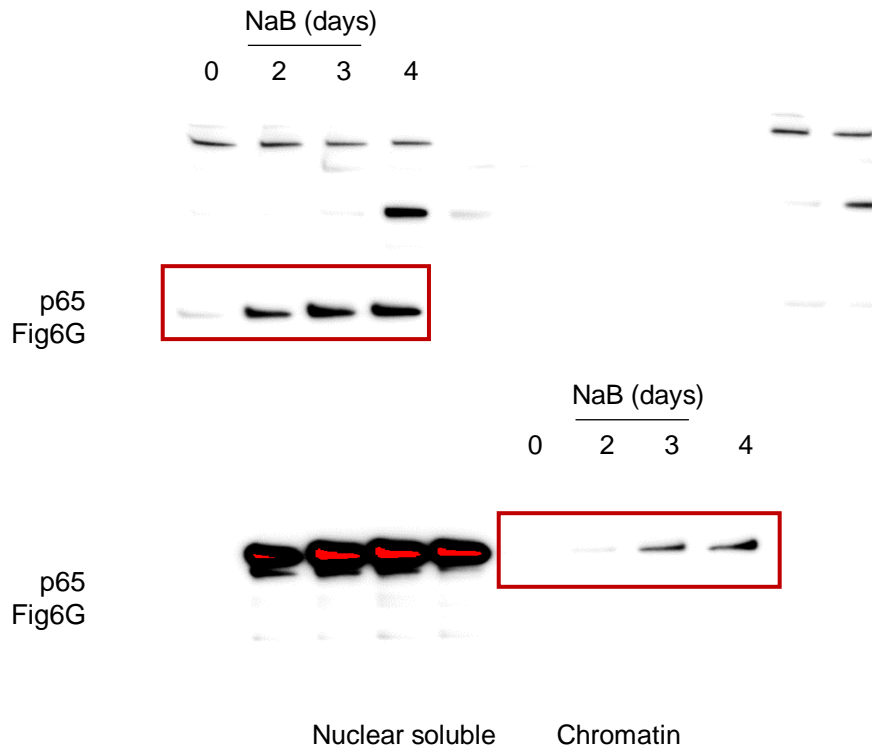

Supplement: EMBR-21-e50718-s003.pdf [file EMBR-21-e50718-s003.pdf]
